# Supplementary material for: Conformational Plasticity-Rigidity Axis of the Coagulation Factor VII Zymogen Elucidated by Atomistic Simulations of the N-Terminally Truncated Factor VIIa Protease Domain
Source: MDPI journal article supplement (doi:10.3390/biom11040549), 2021-04-08
Supplement: s1 [file s1]

## SUPPLEMENTARY MATERIALS

### **Conformational Plasticity-Rigidity Axis of the Coagulation Factor VII Zymogen Elucidated by Atomistic Simulations of the N-Terminally Truncated Factor VIIa Protease Domain**

**Jesper J. Madsen <sup>1,\*</sup> and Ole H. Olsen <sup>2,\*</sup>**

<sup>1</sup> Global and Planetary Health, College of Public Health, University of South Florida, Tampa, FL 33612, USA

<sup>2</sup> Novo Nordisk Foundation Center for Basic Metabolic Research, Section for Metabolic Receptology, University of Copenhagen, Blegdamsvej 3b, DK-2200 Copenhagen N, Denmark

\* Correspondence: [jespermadsen@usf.edu](mailto:jespermadsen@usf.edu) (J.J.M.); [oho@sund.ku.dk](mailto:oho@sund.ku.dk) (O.H.O.)

---

|                                                                       |       |       |       |       |       |       |       |       |       |       |   |
|-----------------------------------------------------------------------|-------|-------|-------|-------|-------|-------|-------|-------|-------|-------|---|
| $C_{\alpha}$ – RMSD (Å)                                               |       |       |       |       |       |       |       |       |       |       |   |
| $\langle \text{FVIIa} \rangle_{\text{MD}}$                            | 0     |       |       |       |       |       |       |       |       |       |   |
| $\langle \text{FVIIa-desIVG} \rangle_{\text{MD}}$                     | 0.936 | 0     |       |       |       |       |       |       |       |       |   |
| $\langle \text{FVIIa}_{\text{VYT}} \rangle_{\text{MD}}$               | 1.860 | 1.955 | 0     |       |       |       |       |       |       |       |   |
| $\langle \text{FVIIa}_{\text{VYT}}\text{-desIVG} \rangle_{\text{MD}}$ | 1.962 | 1.891 | 0.544 | 0     |       |       |       |       |       |       |   |
| $\langle \text{Trypsin} \rangle_{\text{MD}}$                          | 2.405 | 2.530 | 2.328 | 2.435 | 0     |       |       |       |       |       |   |
| $\langle \text{Trypsin-desIVG} \rangle_{\text{MD}}$                   | 2.495 | 2.491 | 2.368 | 2.368 | 0.775 | 0     |       |       |       |       |   |
| $\langle \text{Trypsinogen} \rangle_{\text{MD}}$                      | 3.111 | 3.003 | 2.578 | 2.410 | 1.276 | 0.637 | 0     |       |       |       |   |
| $\text{FVIIa}^{\text{Xtal}}$                                          | 2.198 | 2.320 | 1.483 | 1.628 | 2.860 | 2.953 | 3.104 | 0     |       |       |   |
| $\text{FVIIa}_{\text{VYT}}^{\text{Xtal}}$                             | 1.937 | 2.118 | 0.802 | 1.063 | 2.447 | 2.548 | 2.762 | 1.341 | 0     |       |   |
| $\text{Trypsin}^{\text{Xtal}}$                                        | 2.980 | 3.128 | 2.371 | 2.492 | 0.735 | 1.186 | 1.464 | 2.798 | 2.404 | 0     |   |
| $\text{Trypsinogen}^{\text{Xtal}}$                                    | 3.225 | 3.146 | 2.678 | 2.519 | 1.437 | 1.210 | 1.288 | 3.072 | 2.738 | 1.290 | 0 |

**Table S1:** RMSD values from MD trajectories are reported with reference to the averaged structure over the whole trajectory. RMSD is calculated by the align command in PyMOL without outlier rejection.

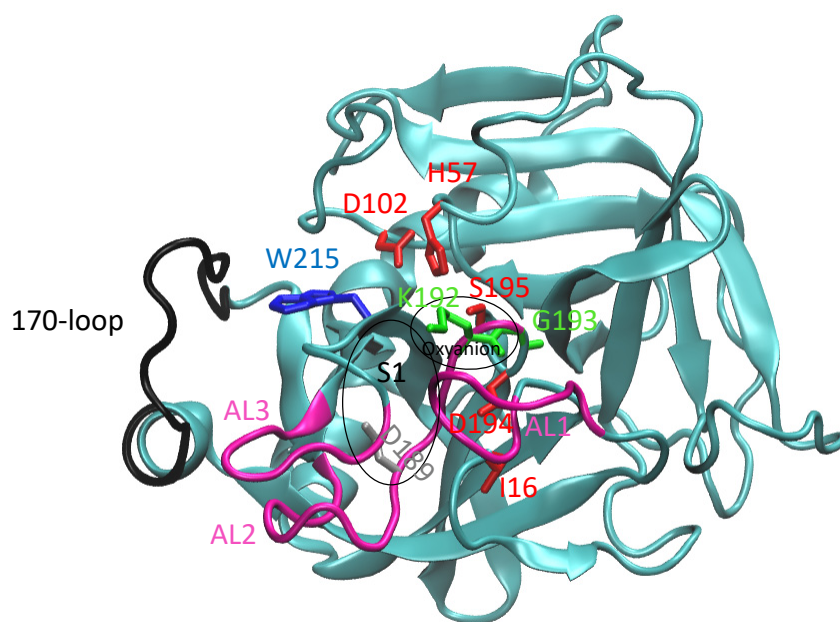

**Figure S1:** FVIIa (PDB ID: 1dan\_H) shown as ribbon diagram with certain key loops (170-loop, AL1-3) and amino acids marked with colored labels. The active site triad consists of D102, H57 and S195 (red). The oxyanion hole consists of K192 and G193 (green). The E/Z-E\*/Z\* conformation is determined by W215 through its distance to H57. The S1 pocket is indicated by the gray circle with D189 placed at the bottom of the pocket.

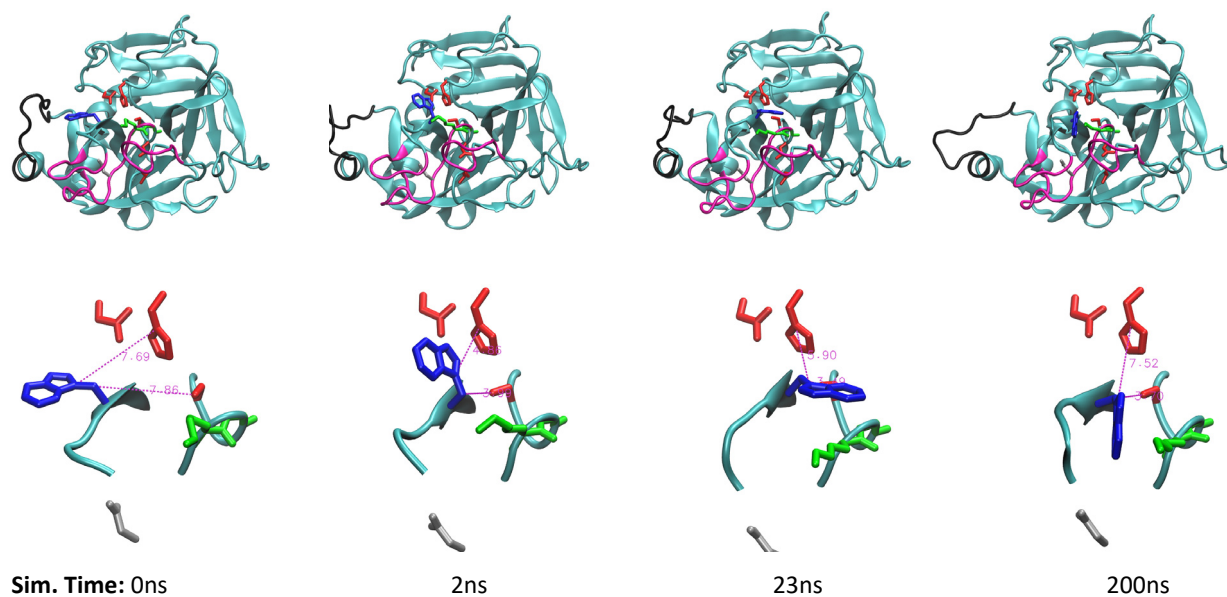

**Figure S2:** Structure of FVIIa (top panels) and a closeup view of the region determining the E/Z-E\*/Z\* conformation (bottom panels) at different stages during the simulation. The graphical details including coloring are consistent with the definition shown in Figure S2.



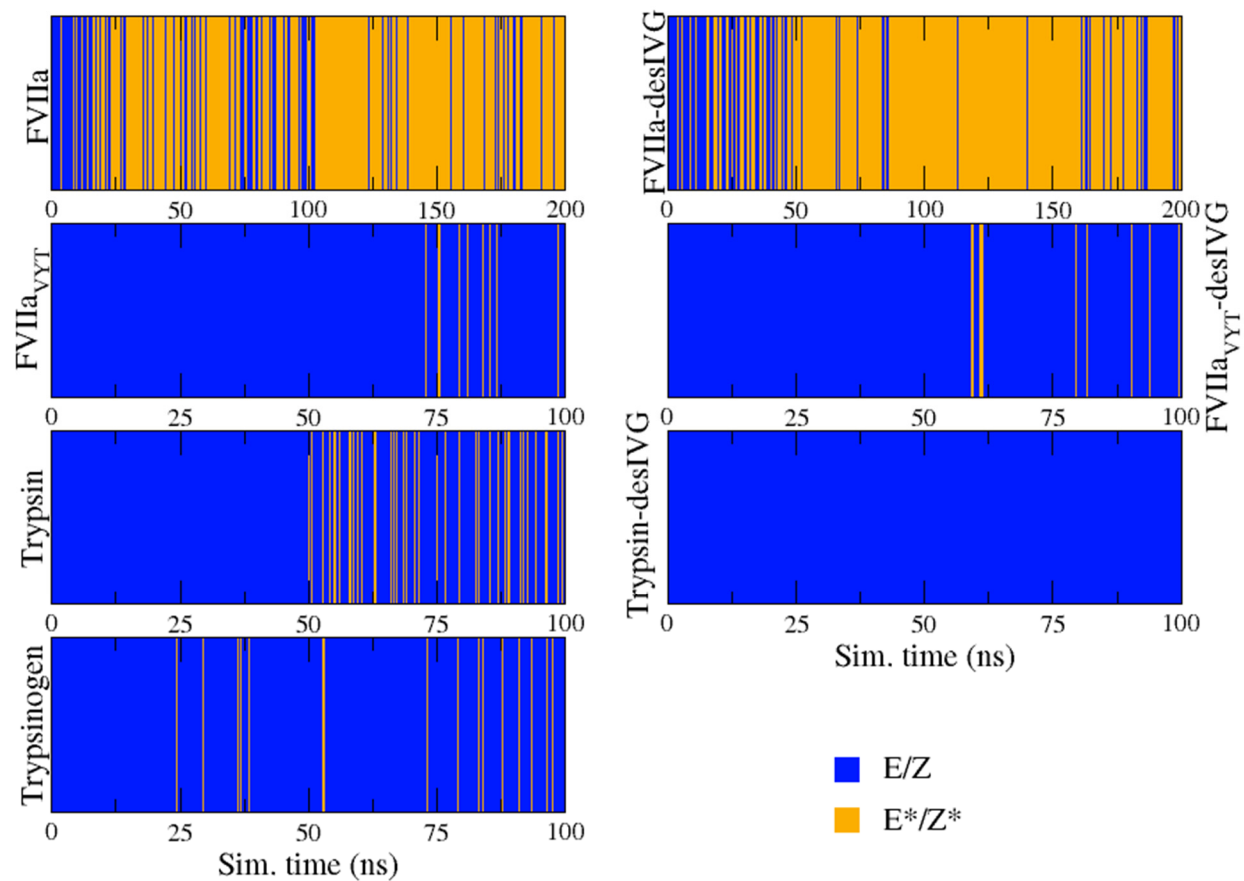

**Figure S3:** Time evolution of E/Z-E\*/Z\* conformational transitions during the simulations.

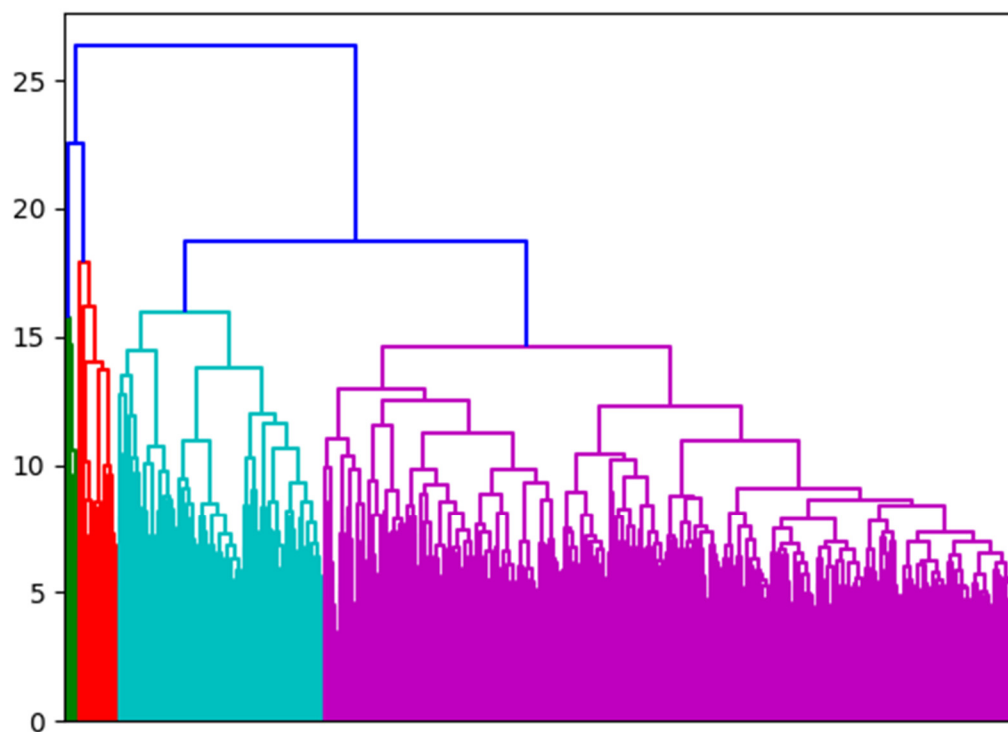

**Figure S4:** Dendrogram of RMSD-based hierarchical clusters from the simulated ensemble of FVIIa. Agglomeration is performed using the average/UPGMA linkage approach.

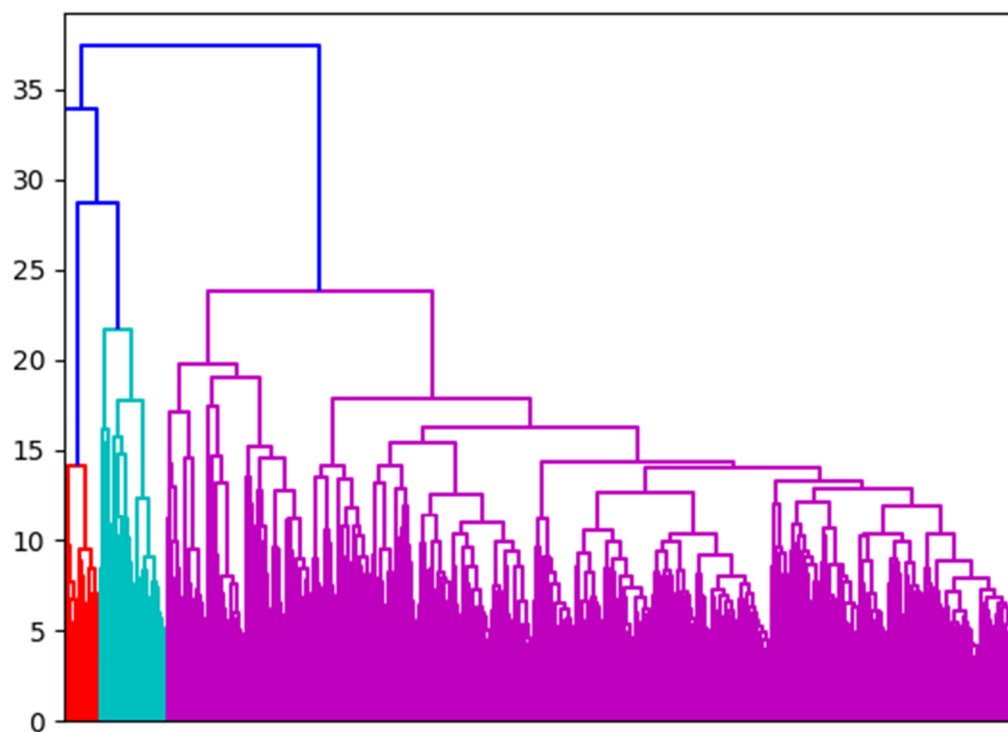

**Figure S5:** Dendrogram of RMSD-based hierarchical clusters from the simulated ensemble of FVIIa-desIVG. Agglomeration is performed using the average/UPGMA linkage approach.

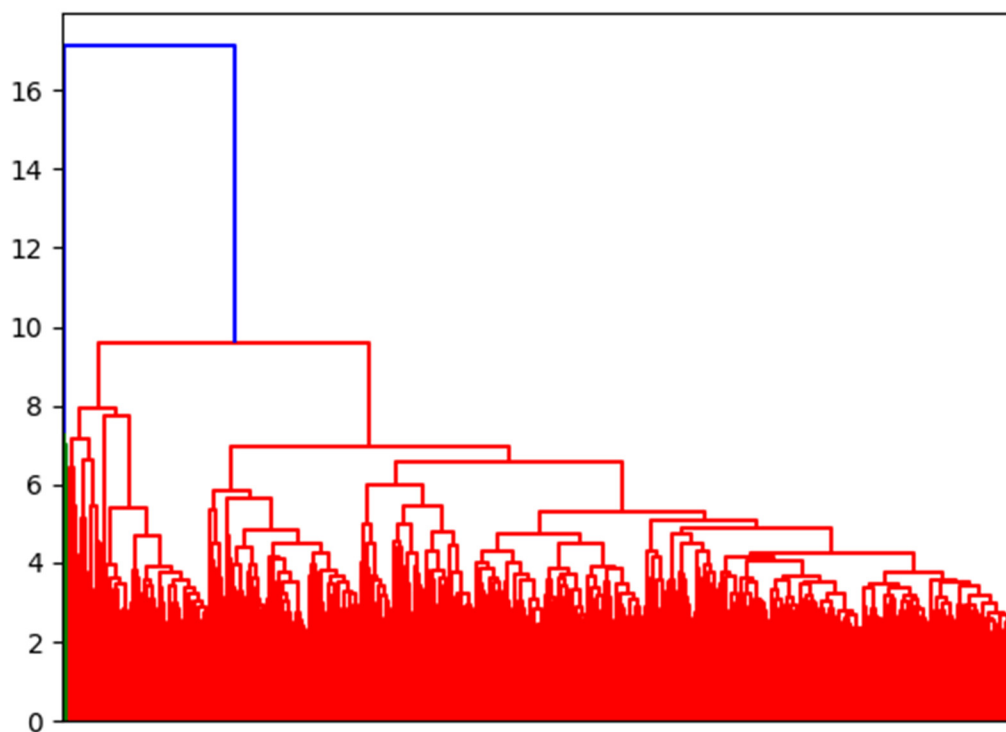

**Figure S6:** Dendrogram of RMSD-based hierarchical clusters from the simulated ensemble of FVIIa<sub>VYT</sub>. Agglomeration is performed using the average/UPGMA linkage approach.

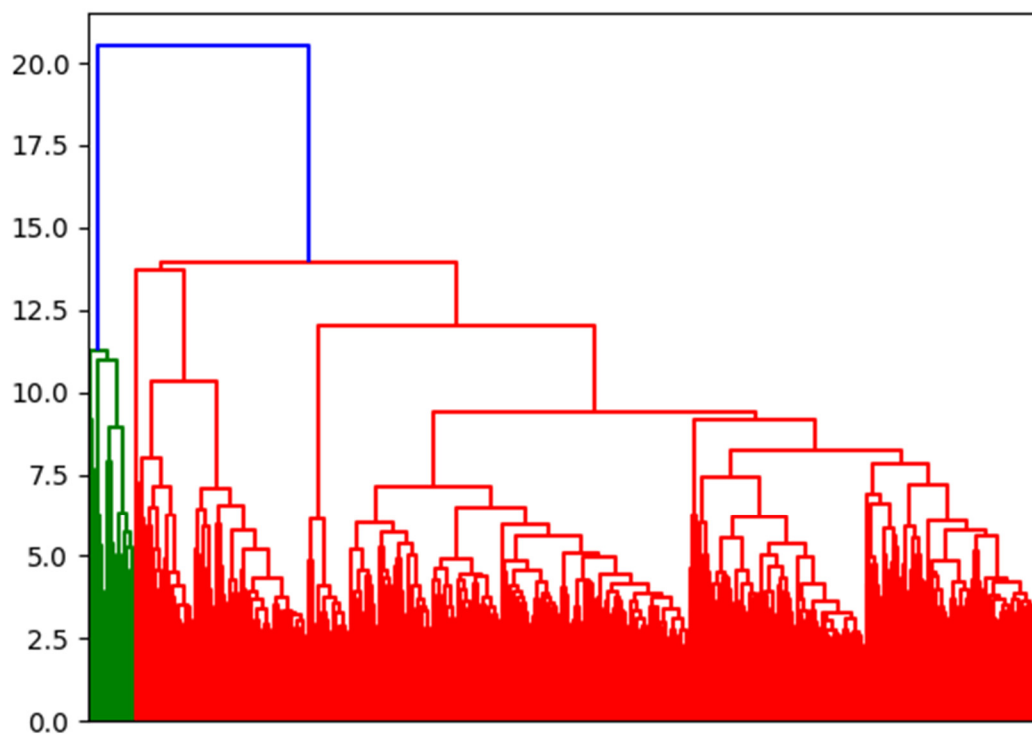

**Figure S7:** Dendrogram of RMSD-based hierarchical clusters from the simulated ensemble of FVIIa<sub>VYT</sub>-desIVG. Agglomeration is performed using the average/UPGMA linkage approach.

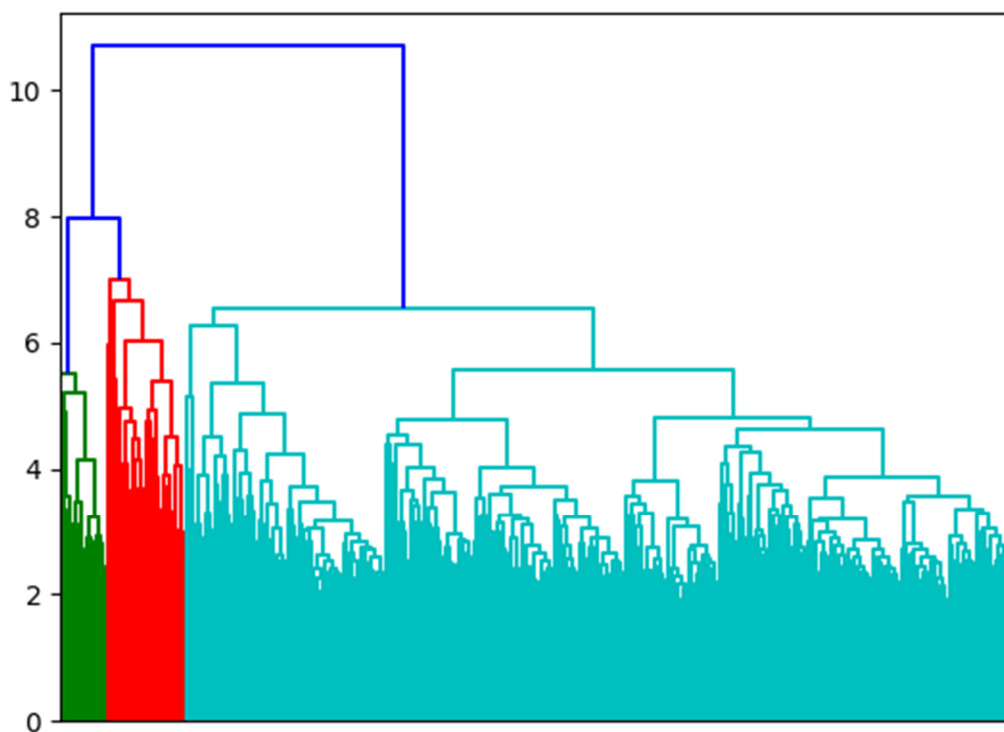

**Figure S8:** Dendrogram of RMSD-based hierarchical clusters from the simulated ensemble of trypsin. Agglomeration is performed using the average/UPGMA linkage approach.

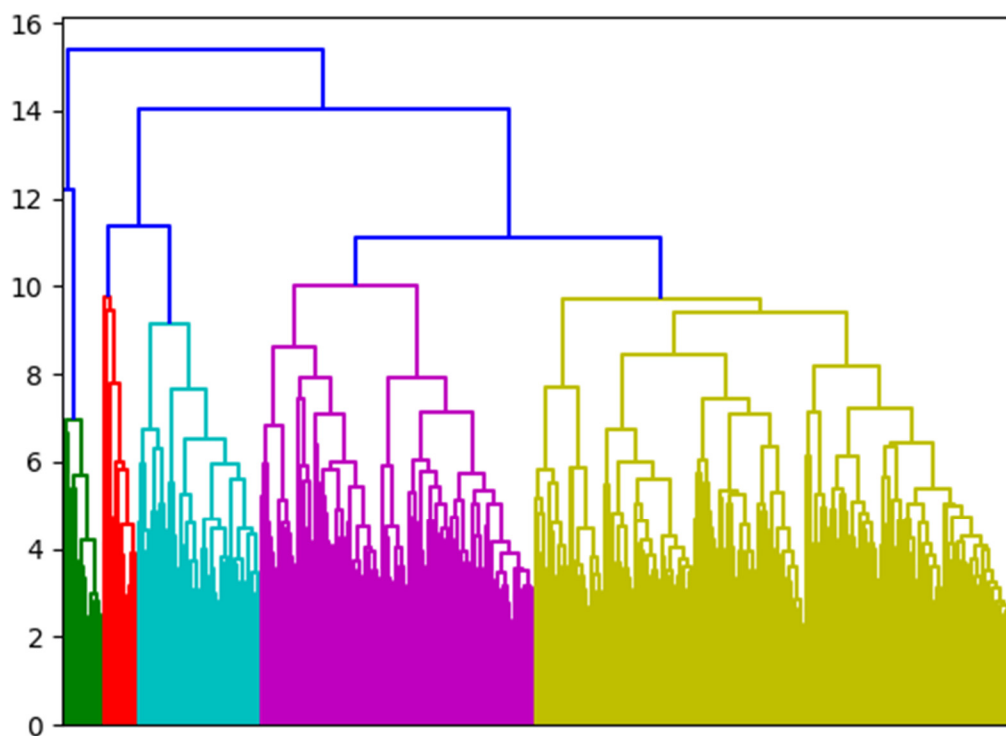

**Figure S9:** Dendrogram of RMSD-based hierarchical clusters from the simulated ensemble of trypsin-desIVG. Agglomeration is performed using the average/UPGMA linkage approach.

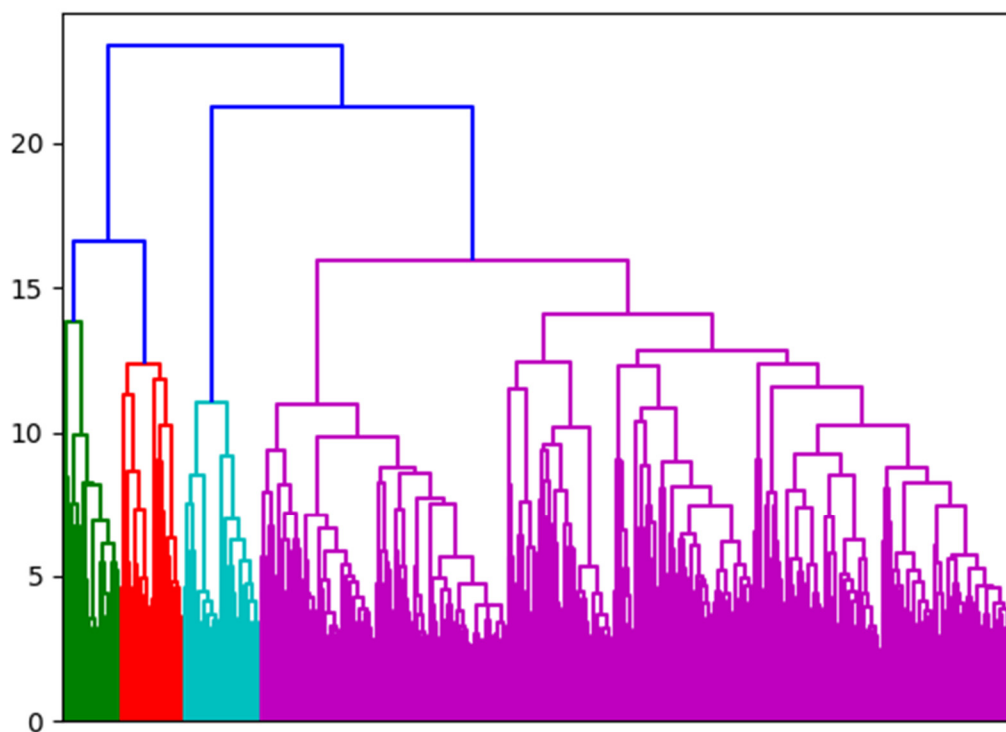

**Figure S10:** Dendrogram of RMSD-based hierarchical clusters from the simulated ensemble of trypsinogen. Agglomeration is performed using the average/UPGMA linkage approach.



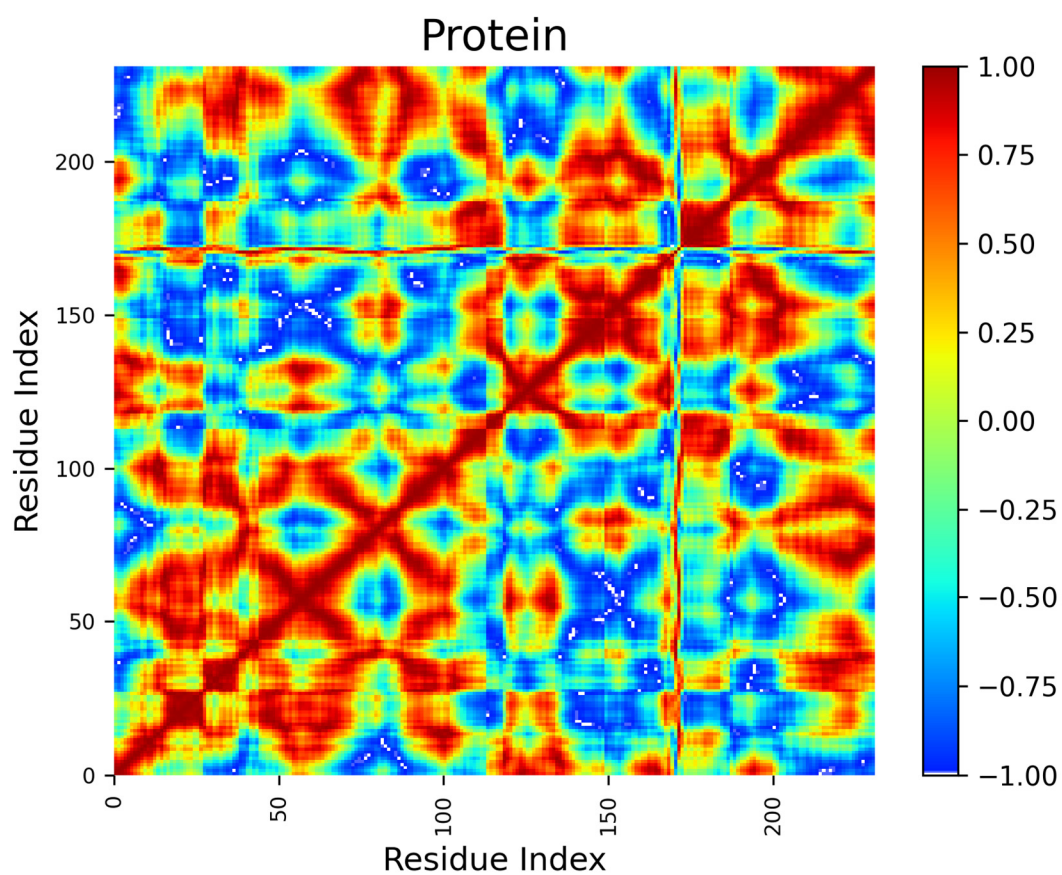

**Figure S11:** Heatmap of per-residue dynamic cross-correlations over the simulated trajectory of FVIIa.

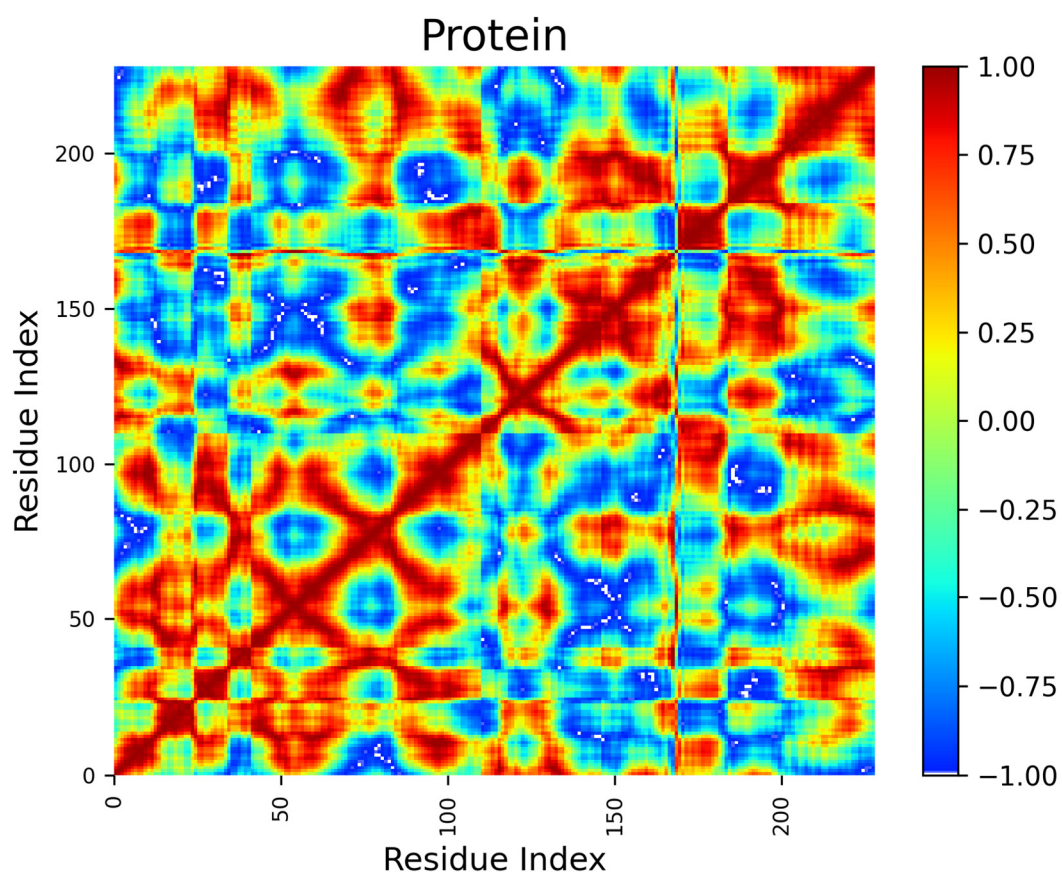

**Figure S12:** Heatmap of per-residue dynamic cross-correlations over the simulated trajectory of FVIIa-desIVG.

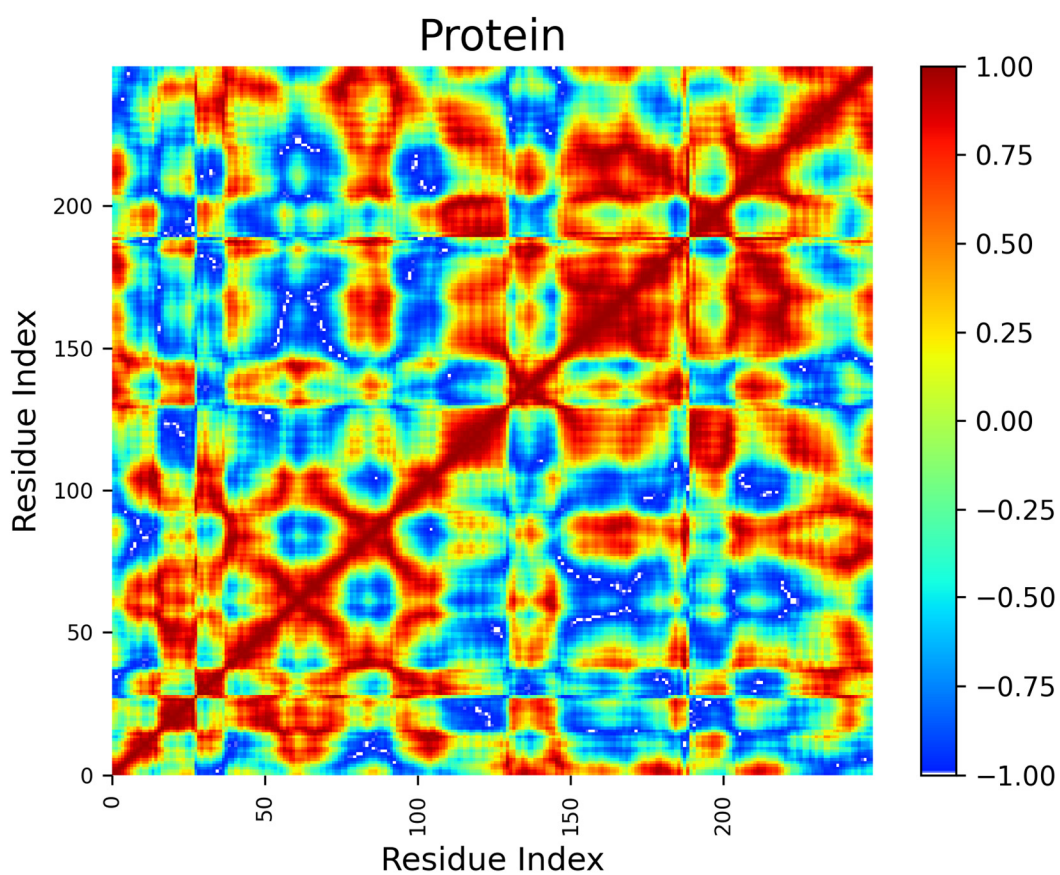

**Figure S13:** Heatmap of per-residue dynamic cross-correlations over the simulated trajectory of FVIIa<sub>vyt</sub>.

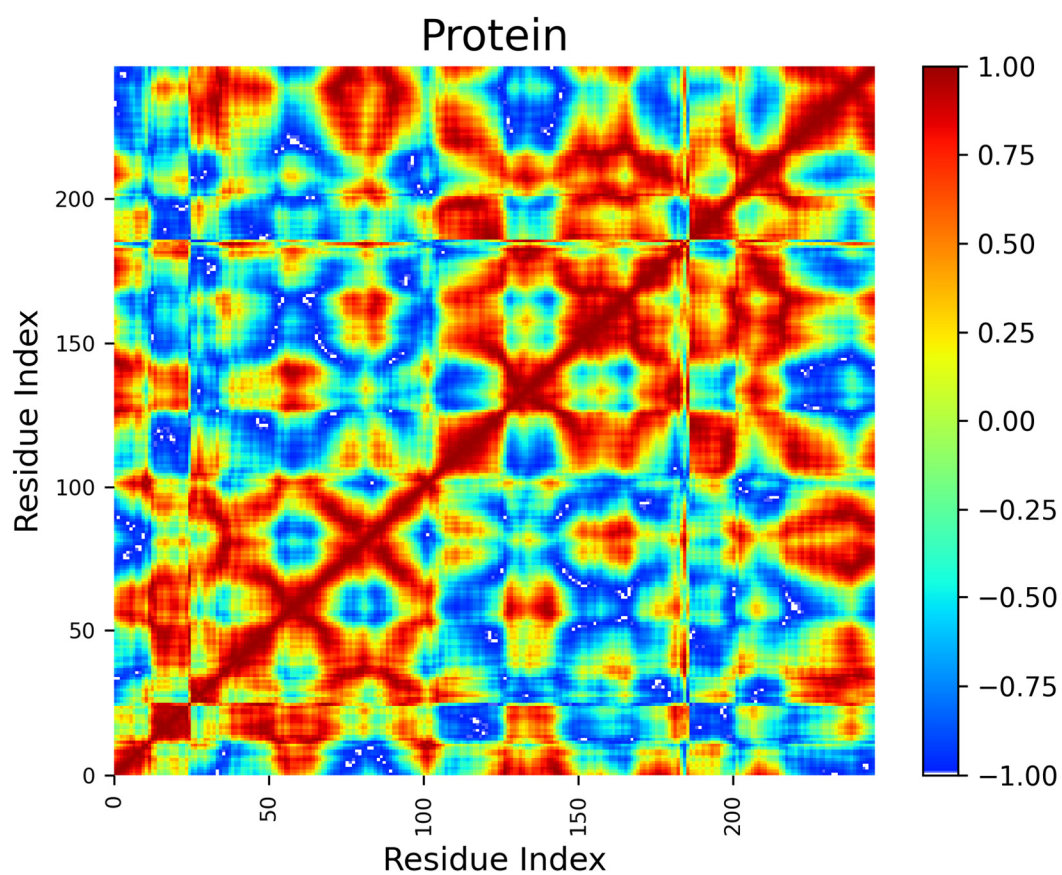

**Figure S14:** Heatmap of per-residue dynamic cross-correlations over the simulated trajectory of FVIIa<sub>VYT</sub>-desIVG.



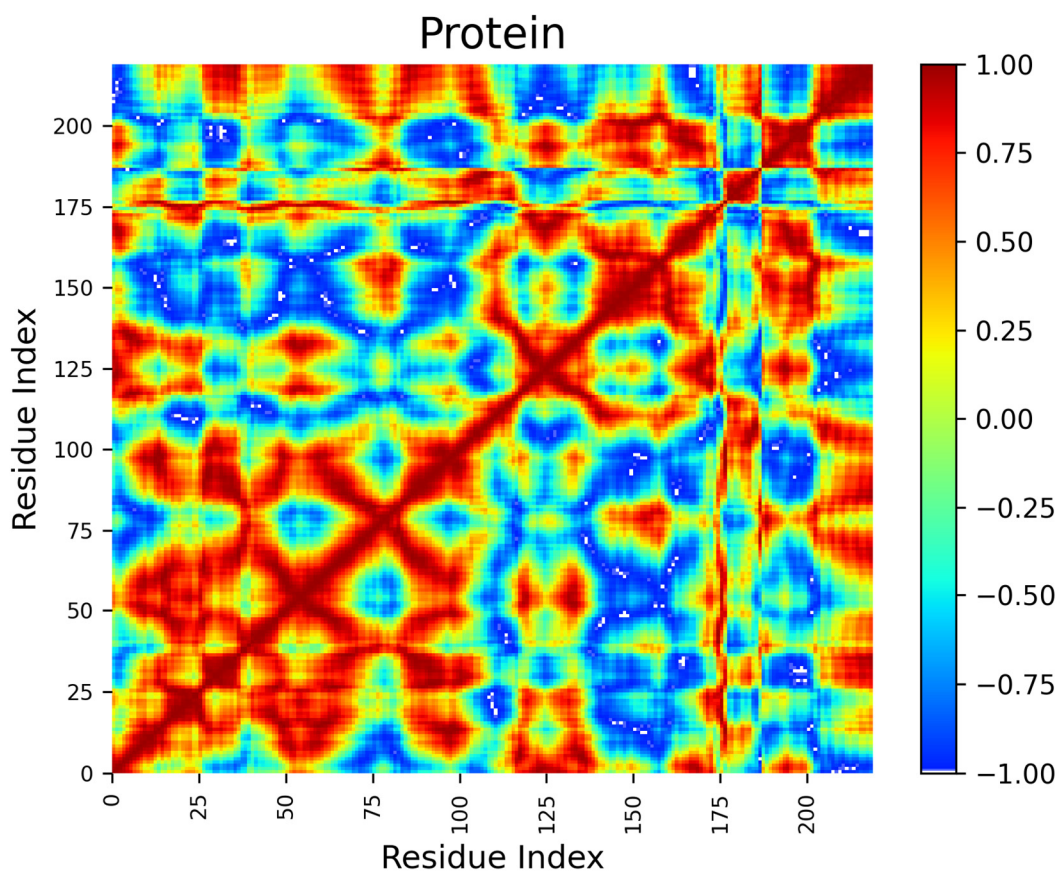

**Figure S15:** Heatmap of per-residue dynamic cross-correlations over the simulated trajectory of trypsin.

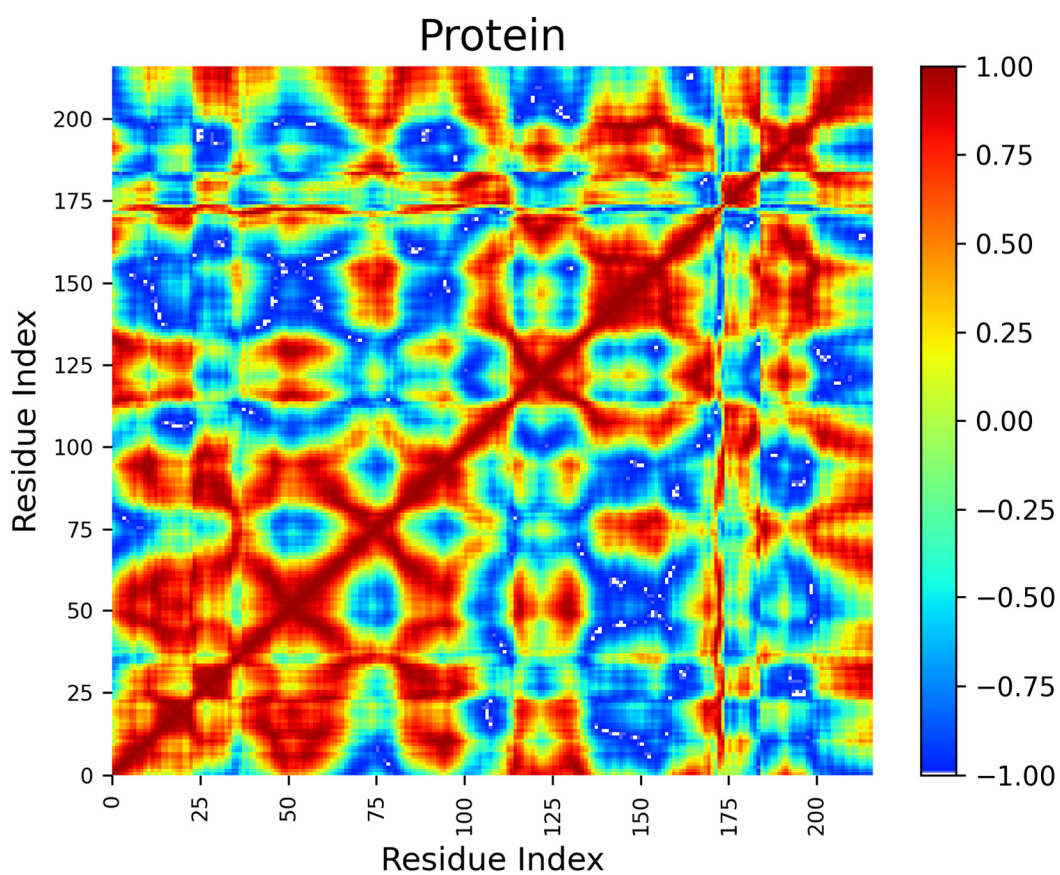

**Figure S16:** Heatmap of per-residue dynamic cross-correlations over the simulated trajectory of trypsin-desIVG.

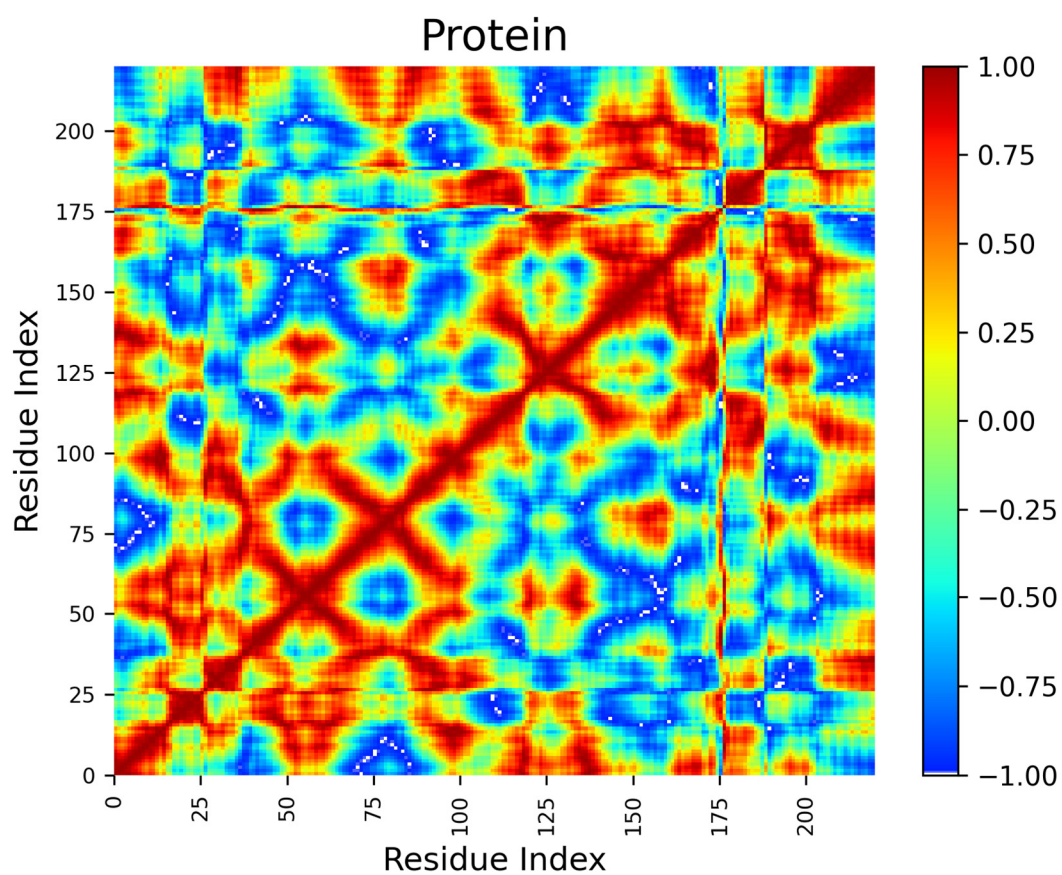

**Figure S17:** Heatmap of per-residue dynamic cross-correlations over the simulated trajectory of trypsinogen.
